# Supplementary material for: Biomolecules Responsible for the Total Antioxidant Capacity (TAC) of Human Plasma in Healthy and Cardiopathic Individuals: A Chemical Speciation Model
Source: MDPI journal article supplement (doi:10.3390/antiox10050656), 2021-04-23
Supplement: s1 [file s1]

# Supplementary Materials: Biomolecules Responsible for the Total Antioxidant Capacity (TAC) of Human Plasma in Healthy and Cardiopathic Individuals: A Chemical Speciation Model

Enrico Prenesti <sup>1</sup>, Silvia Berto <sup>1,\*</sup>, Fabio Gosmaro <sup>1,2</sup>, Marco Bagnati <sup>3</sup> and Giorgio Bellomo <sup>3</sup>

- <sup>1</sup> Department of Chemistry, University of Turin, Via Pietro Giuria 5, 10125 Turin, Italy; enrico.prenesti@unito.it (E.P.); fabiogos@yahoo.it (F.G.)
- <sup>2</sup> Istituto Professionale di Stato per Servizi Alberghieri e Ristorazione G. Giolitti, Piazza IV Novembre, 12080 Mondovì, Italy
- <sup>3</sup> Clinical Chemical Analysis Laboratory of the University Hospital “Maggiore della Carità”, University of Eastern Piedmont Amedeo Avogadro, C.so Giuseppe Mazzini, 18, 28100 Novara, Italy; marco.bagnati@maggioreosp.novara.it (M.B.); bellomo.giorgio@gmail.com (G.B.)
- \* Correspondence: silvia.berto@unito.it.

## 1. Significance of antioxidants as predictors of healthy individuals’ TAC

**Table S1** – Variables considered in the different model for healthy individuals.

| Model <sup>1</sup> | Variables in                                                                                                                        | Variables out        | Procedures                                           |
|--------------------|-------------------------------------------------------------------------------------------------------------------------------------|----------------------|------------------------------------------------------|
| 1                  | Uric Acid, Total Bilirubin, Thiols, Retinol, $\gamma$ -Tocopherol, $\alpha$ -Tocopherol, Lycopene, $\beta$ -Carotene, Ascorbic acid | ---                  | ---                                                  |
| 2                  | Uric Acid, Total Bilirubin, Thiols, Retinol, $\gamma$ -Tocopherol, $\alpha$ -Tocopherol, $\beta$ -Carotene, Ascorbic acid           | Lycopene             | Backward removal (removal criterion: $p \geq 0.10$ ) |
| 3                  | Uric Acid, Total Bilirubin, Thiols, Retinol, $\alpha$ -Tocopherol, Lycopene, $\beta$ -Carotene, Ascorbic acid                       | $\gamma$ -Tocopherol | Backward removal (removal criterion: $p \geq 0.10$ ) |
| 4                  | Uric Acid, Total Bilirubin, Thiols, $\gamma$ -Tocopherol, $\alpha$ -Tocopherol, Lycopene, $\beta$ -Carotene, Ascorbic acid          | Retinol              | Backward removal (removal criterion: $p \geq 0.10$ ) |
| 5                  | Uric Acid, Total Bilirubin, Thiols, Retinol, $\gamma$ -Tocopherol, $\alpha$ -Tocopherol, Lycopene, Ascorbic acid                    | $\beta$ -Carotene    | Backward removal (removal criterion: $p \geq 0.10$ ) |

<sup>1</sup> dependent variable: TAC; weighted least square regression: weight for TAC is  $w = TAC^{-2}$ ; regression forced through the origin.

**Table S2** – Model parameters for healthy individuals.

| Model <sup>1</sup> | R     | R-square | Adj. R-square | ROOT-MSE |
|--------------------|-------|----------|---------------|----------|
| 1                  | 0.999 | 0.998    | 0.998         | 1.49651  |
| 2                  | 0.999 | 0.998    | 0.998         | 1.48846  |
| 3                  | 0.999 | 0.998    | 0.998         | 1.48130  |

|   |       |       |       |         |
|---|-------|-------|-------|---------|
| 4 | 0.999 | 0.998 | 0.998 | 1.47967 |
| 5 | 0.999 | 0.998 | 0.998 | 1.48018 |

<sup>1</sup> dependent variable: TAC; weighted least square regression: weight for TAC is  $w = \text{TAC}^{-2}$ ; regression forced through the origin,  
model 1: Predictors: urate, total bilirubin, thiols groups, retinol,  $\gamma$ -tocopherol,  $\alpha$ -tocopherol, lycopene,  $\beta$ -carotene, L-ascorbic acid  
model 2 - Predictors: urate, total bilirubin, thiols groups, retinol,  $\gamma$ -tocopherol,  $\alpha$ -tocopherol,  $\beta$ -carotene, L-ascorbic acid  
model 3 - Predictors: urate, total bilirubin, thiols groups, retinol,  $\alpha$ -tocopherol,  $\beta$ -carotene, L-ascorbic acid  
model 4 - Predictors: urate, total bilirubin, thiols groups,  $\alpha$ -tocopherol,  $\beta$ -carotene, L-ascorbic acid  
model 5 - Predictors: urate, total bilirubin, thiols groups,  $\alpha$ -tocopherol, L-ascorbic acid.

**Table S3** – Results of ANOVA test for healthy individuals.

| Model <sup>1</sup> | Sum of square | Degree of freedom | Variance  | F        | Significance |
|--------------------|---------------|-------------------|-----------|----------|--------------|
| 1 Regression       | 93040.936     | 9                 | 10337.882 | 4616.095 | 0.000        |
| Prediction error   | 170.204       | 76                | 2.240     |          |              |
| Total              | 93211.140     | 85                |           |          |              |
| 2 Regression       | 93040.545     | 8                 | 11630.068 | 5249.376 | 0.000        |
| Prediction error   | 170.595       | 77                | 2.216     |          |              |
| Total              | 93211.140     | 85                |           |          |              |
| 3 Regression       | 93039.989     | 7                 | 13291.427 | 6057.399 | 0.000        |
| Prediction error   | 171.151       | 78                | 2.194     |          |              |
| Total              | 93211.140     | 85                |           |          |              |
| 4 Regression       | 93038.175     | 6                 | 15506.362 | 7082.358 | 0.000        |
| Prediction error   | 172.965       | 79                | 2.189     |          |              |
| Total              | 93211.140     | 85                |           |          |              |
| 5 Regression       | 93035.865     | 5                 | 18607.173 | 8492.807 | 0.000        |
| Prediction error   | 175.275       | 80                | 2.191     |          |              |
| Total              | 93211.140     | 85                |           |          |              |

<sup>1</sup> dependent variable: TAC; weighted least square regression: weight for TAC is  $w = \text{TAC}^{-2}$ ; regression forced through the origin,  
model 1: Predictors: urate, total bilirubin, thiols groups, retinol,  $\gamma$ -tocopherol,  $\alpha$ -tocopherol, lycopene,  $\beta$ -carotene, L-ascorbic acid  
model 2 - Predictors: urate, total bilirubin, thiols groups, retinol,  $\gamma$ -tocopherol,  $\alpha$ -tocopherol,  $\beta$ -carotene, L-ascorbic acid  
model 3 - Predictors: urate, total bilirubin, thiols groups, retinol,  $\alpha$ -tocopherol,  $\beta$ -carotene, L-ascorbic acid  
model 4 - Predictors: urate, total bilirubin, thiols groups,  $\alpha$ -tocopherol,  $\beta$ -carotene, L-ascorbic acid  
model 5 - Predictors: urate, total bilirubin, thiols groups,  $\alpha$ -tocopherol, L-ascorbic acid.

## 2. Redox factors

### *Study of the redox reaction between Cu(II) and Bilirubin*

Six separate series of bilirubin standard solutions (concentrations: 2.5, 5.0, 12.5, 25, 50 and 100  $\mu\text{mol L}^{-1}$ ) were prepared and analyzed in three replicates. The reaction under study was left up to the signal saturation (time reaction = 30 min) to estimate the electronic exchange between Cu(I) and bilirubin. Results reported in Table 4S show experimental slope equal to 8.044 with standard deviation of 0.223, indicating an electronic exchange equal to eight for the redox reaction under consideration.

**Table S4** – Results of the study of the redox reaction between Cu(II) and Bilirubin at 30 min.

| Summary of the coefficients <sup>1</sup> |                |                    |               |              |              |
|------------------------------------------|----------------|--------------------|---------------|--------------|--------------|
|                                          | Value          | Standard deviation | t-value       | Significance |              |
| Slope                                    | 8.044          | 0.223              | 36.135        | 0.000        |              |
| Intercept                                | 3.119          | 0.047              | 66.075        | 0.000        |              |
| Summary of ANOVA test                    |                |                    |               |              |              |
|                                          | Sum of squares | Degrees of freedom | Variance      | F            | Significance |
| Model                                    | 625.210        | 1                  | 625.210       | 1305.753     | 0.000        |
| Prediction error                         | 7.661          | 16                 | 0.479         |              |              |
| Total                                    | 632.871        | 17                 |               |              |              |
| Summary of the model                     |                |                    |               |              |              |
|                                          | R              | R-square           | Adj. R-square | ROOT-MSE     | N            |
| Model                                    | 0.994          | 0.988              | 0.987         | 0.692        | 18           |

<sup>1</sup> predictor: C<sub>Bilirubin</sub>, dependent variable: C<sub>Cu(I)</sub>, weighted least square regression: weight for C<sub>Bilirubin</sub> is  $w = C_{Bilirubin}^{-1.5}$ .

Since the aim of the study is focused on the investigation of redox reaction between Cu(II) and bilirubin under the CUPRAC-BCS method condition (time reaction = 4 min), the amount of the electronic exchange at 4 min was estimated.

Results in Table 5S show experimental slope equal to 7.433 with standard deviation of 0.084.

**Table S5** – Results of the study of the redox reaction between Cu(II) and Bilirubin under the CUPRAC-BCS method condition.

| Summary of the coefficients <sup>1</sup> |                |                    |               |              |              |
|------------------------------------------|----------------|--------------------|---------------|--------------|--------------|
|                                          | Value          | Standard deviation | t-value       | Significance |              |
| Slope                                    | 7.433          | 0.084              | 88.997        | 0.000        |              |
| Intercept                                | 2.350          | 0.059              | 40.165        | 0.000        |              |
| Summary of ANOVA test                    |                |                    |               |              |              |
|                                          | Sum of squares | Degrees of freedom | Variance      | F            | Significance |
| Model                                    | 651.848        | 1                  | 651.848       | 7920.524     | 0.000        |
| Prediction error                         | 1.371          | 16                 | 0.082         |              |              |
| Total                                    | 653.165        | 17                 |               |              |              |
| Summary of the model                     |                |                    |               |              |              |
|                                          | R              | R-square           | Adj. R-square | ROOT-MSE     | N            |
| Model                                    | 0.999          | 0.998              | 0.998         | 0.287        | 18           |

<sup>1</sup> predictor: C<sub>Bilirubin</sub>, dependent variable: C<sub>Cu(I)</sub>, weighted least square regression: weight for C<sub>Bilirubin</sub> is  $w = C_{Bilirubin}^{-0.5}$ .

### 3. Speciation model of the TAC

**Table S6** – Contributions of plasma redox active molecules to the TAC of healthy individuals.

| Substance            | n  | Redox Factor | Min (%) | Max (%) | Mean $\pm$ SE <sup>1</sup> (%) |
|----------------------|----|--------------|---------|---------|--------------------------------|
| Uric Acid            | 85 | 2.0          | 32.50   | 62.69   | 47.97 $\pm$ 0.65               |
| Total Bilirubin      | 85 | 7.4          | 3.25    | 44.24   | 9.50 $\pm$ 0.61                |
| Thiols               | 85 | 0.6          | 15.29   | 37.20   | 25.83 $\pm$ 0.52               |
| $\alpha$ -Tocopherol | 85 | 2.0          | 1.98    | 5.45    | 3.36 $\pm$ 0.09                |
| L-Ascorbic acid      | 85 | 2.0          | 2.07    | 55.51   | 14.63 $\pm$ 1.15               |
| TOTAL                | 85 |              |         |         | 101.29 $\pm$ 3.02              |

<sup>1</sup> SE is the symbol for standard deviation error. SE is expressed as SD/ $\sqrt{n}$  where SD is the standard deviation.

### 4. Significance of antioxidants as predictors of cardiopathic individuals' TAC

**Table S7** – Variables considered in the different model for cardiopathic individuals.

| Model <sup>1</sup> | Variables in                                                                                                                          | Variables out        | Procedures                                           |
|--------------------|---------------------------------------------------------------------------------------------------------------------------------------|----------------------|------------------------------------------------------|
| 1                  | Uric Acid, Total Bilirubin, Thiols, Retinol, $\gamma$ -Tocopherol, $\alpha$ -Tocopherol, Lycopene, $\beta$ -Carotene, L-Ascorbic acid | ---                  | ---                                                  |
| 2                  | Uric Acid, Total Bilirubin, Thiols, Retinol, $\gamma$ -Tocopherol, $\alpha$ -Tocopherol, $\beta$ -Carotene, L-Ascorbic acid           | Lycopene             | Backward removal (removal criterion: $p \geq 0.10$ ) |
| 3                  | Uric Acid, Total Bilirubin, Thiols, Retinol, $\gamma$ -Tocopherol, $\alpha$ -Tocopherol, Lycopene, L-Ascorbic acid                    | $\beta$ -Carotene    | Backward removal (removal criterion: $p \geq 0.10$ ) |
| 4                  | Uric Acid, Total Bilirubin, Thiols, Retinol, $\gamma$ -Tocopherol, Lycopene, $\beta$ -Carotene, L-Ascorbic acid                       | $\alpha$ -Tocopherol | Backward removal (removal criterion: $p \geq 0.10$ ) |
| 5                  | Uric Acid, Total Bilirubin, Thiols, $\gamma$ -Tocopherol, $\alpha$ -Tocopherol, Lycopene, $\beta$ -Carotene, L-Ascorbic acid          | Retinol              | Backward removal (removal criterion: $p \geq 0.10$ ) |

<sup>1</sup> dependent variable: TAC; weighted least square regression: weight for TAC is  $w = \text{TAC}^{-2}$ ; regression forced through the origin.

**Table S8** – Model parameters for cardiopathic individuals.

| Model <sup>1</sup> | R     | R-square | Adj. R-square | ROOT-MSE |
|--------------------|-------|----------|---------------|----------|
| 1                  | 0.995 | 0.989    | 0.983         | 0.129    |
| 2                  | 0.995 | 0.989    | 0.984         | 0.125    |
| 3                  | 0.995 | 0.989    | 0.985         | 0.122    |
| 4                  | 0.995 | 0.989    | 0.986         | 0.119    |

|          |       |       |       |       |
|----------|-------|-------|-------|-------|
| <b>5</b> | 0.994 | 0.989 | 0.986 | 0.119 |
|----------|-------|-------|-------|-------|

<sup>1</sup> dependent variable: TAC; weighted least square regression: weight for is  $w = \text{TAC}^{-2}$ ; regression forced through the origin;  
model 1 - Predictors: Uric Acid, Total Bilirubin, Thiols, Retinol,  $\gamma$ -Tocopherol,  $\alpha$ -Tocopherol, Lycopene,  $\beta$ -Carotene, L-Ascorbic acid;  
model 2 - Predictors: Uric Acid, Total Bilirubin, Thiols, Retinol,  $\gamma$ -Tocopherol,  $\alpha$ -Tocopherol,  $\beta$ -Carotene, L-Ascorbic acid;  
model 3 - Predictors: Uric Acid, Total Bilirubin, Thiols, Retinol,  $\gamma$ -Tocopherol,  $\alpha$ -Tocopherol, L-Ascorbic acid;  
model 4 - Predictors: Uric Acid, Total Bilirubin, Thiols, Retinol,  $\gamma$ -Tocopherol, L-Ascorbic acid;  
model 5 - Predictors: Uric Acid, Total Bilirubin, Thiols,  $\gamma$ -Tocopherol, L-Ascorbic acid.

**Table S9** – Results of the ANOVA test for cardiopathic individuals.

| <b>Model <sup>1</sup></b> | <b>Sum of square</b> | <b>Degree of freedom</b> | <b>Variance</b> | <b>F</b> | <b>Significance</b> |
|---------------------------|----------------------|--------------------------|-----------------|----------|---------------------|
| <b>1</b> Regression       | 24.732               | 9                        | 2.748           | 164.279  | 0.000               |
| Prediction error          | 0.268                | 16                       | 0.017           |          |                     |
| Total                     | 25.000               | 25                       |                 |          |                     |
| <b>2</b> Regression       | 24.732               | 8                        | 3.092           | 196.346  | 0.000               |
| Prediction error          | 0.268                | 17                       | 0.016           |          |                     |
| Total                     | 25.000               | 25                       |                 |          |                     |
| <b>3</b> Regression       | 24.731               | 7                        | 3.533           | 236.104  | 0.000               |
| Prediction error          | 0.269                | 18                       | 0.015           |          |                     |
| Total                     | 25.000               | 25                       |                 |          |                     |
| <b>4</b> Regression       | 24.729               | 6                        | 4.122           | 289.119  | 0.000               |
| Prediction error          | 0.271                | 19                       | 0.014           |          |                     |
| Total                     | 25.000               | 25                       |                 |          |                     |
| <b>5</b> Regression       | 24.717               | 5                        | 4.943           | 349.421  | 0.000               |
| Prediction error          | 0.283                | 20                       | 0.014           |          |                     |
| Total                     | 25.000               | 25                       |                 |          |                     |

<sup>1</sup> dependent variable: TAC; weighted least square regression: weight for is  $w = \text{TAC}^{-2}$ ; regression forced through the origin;  
model 1 - Predictors: Uric Acid, Total Bilirubin, Thiols, Retinol,  $\gamma$ -Tocopherol,  $\alpha$ -Tocopherol, Lycopene,  $\beta$ -Carotene, L-Ascorbic acid;  
model 2 - Predictors: Uric Acid, Total Bilirubin, Thiols, Retinol,  $\gamma$ -Tocopherol,  $\alpha$ -Tocopherol,  $\beta$ -Carotene, L-Ascorbic acid;  
model 3 - Predictors: Uric Acid, Total Bilirubin, Thiols, Retinol,  $\gamma$ -Tocopherol,  $\alpha$ -Tocopherol, L-Ascorbic acid;  
model 4 - Predictors: Uric Acid, Total Bilirubin, Thiols, Retinol,  $\gamma$ -Tocopherol, L-Ascorbic acid;  
model 5 - Predictors: Uric Acid, Total Bilirubin, Thiols,  $\gamma$ -Tocopherol, L-Ascorbic acid.

**Table S10** – Contributions of the redox active biomolecules to the TAC of cardiopathic individuals.

| <b>Substance</b>     | <b>n</b> | <b>Redox Factor</b> | <b>Min (%)</b> | <b>Max (%)</b> | <b>Mean <math>\pm</math> SE <sup>1</sup> (%)</b> |
|----------------------|----------|---------------------|----------------|----------------|--------------------------------------------------|
| Urate                | 25       | 2.0                 | 30.78          | 64.86          | 47.61 $\pm$ 2.05                                 |
| Bilirubin            | 25       | 7.4                 | 3.22           | 27.80          | 9.95 $\pm$ 1.22                                  |
| Thiols               | 25       | 0.6                 | 8.09           | 48.97          | 21.26 $\pm$ 2.31                                 |
| $\gamma$ -Tocopherol | 25       | 2.0                 | 0.01           | 1.19           | 0.22 $\pm$ 0.05                                  |

|                 |    |     |      |       |              |
|-----------------|----|-----|------|-------|--------------|
| L-Ascorbic acid | 25 | 2.0 | 1.01 | 11.77 | 3.65 ± 0.48  |
| Total           | 25 |     |      |       | 82.69 ± 6.11 |

<sup>1</sup> SE is the symbol for standard deviation error. SE is expressed as  $SD/\sqrt{n}$  where SD is the standard deviation.
